# Supplementary material
Source: publisher figshare collection journal article supplement (https://rs.figshare.com/ndownloader/files/30793056)
Supplement: Supplementary file 1 [file 30793056]

**Figure S3**

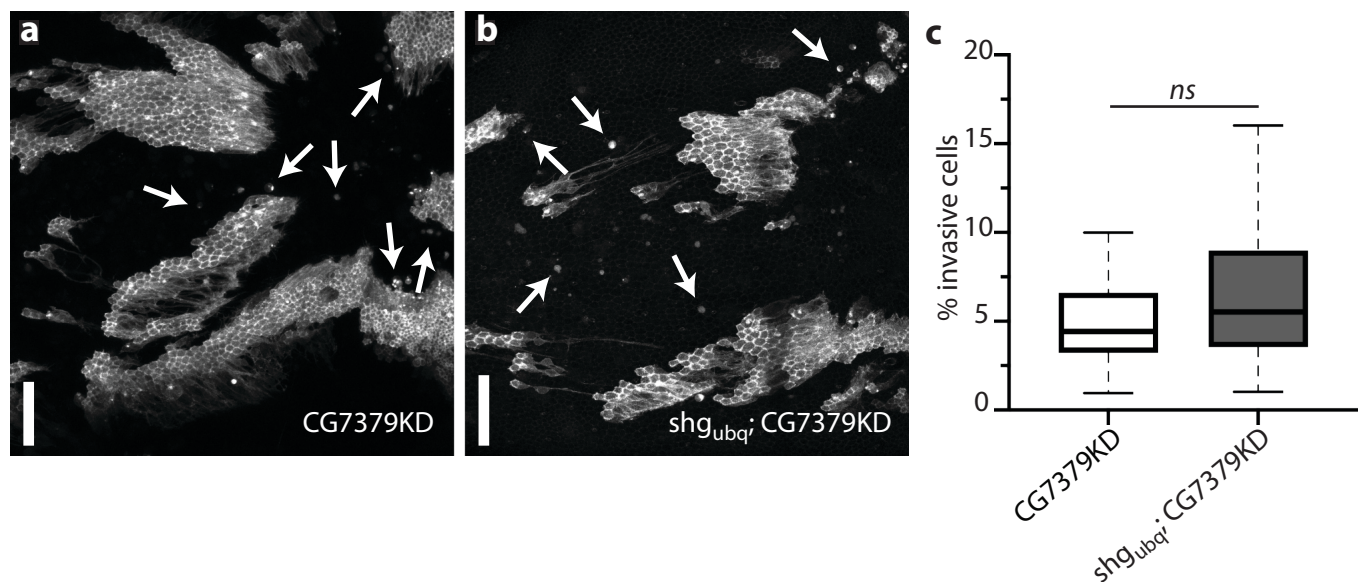

**Figure S3: E-cadherin overexpression cannot rescue CG7379KD induced cell delamination**

**(a-b)** Representative confocal image of GFP:Moe labelled CG7379KD clones in an otherwise WT *Drosophila* notum (a), and CG7379KD in a notum overexpressing E-cadherin (b). Images represent max projection of confocal z stacks. Arrows point towards example invasive cells. Scale bar: 50 $\mu$ m. **(c)** Quantification of (a-b) shows no significant change in invasive levels.  $n \geq 20$  animals/ genotype. Mann-Whitney U test was performed to determine statistical significance.
